# Supplementary material
Source: publisher figshare collection journal article supplement (https://acs.figshare.com/ndownloader/files/5116543)
Supplement: Supplementary file 1 [file 5116543]

# Paratactic Assembly of Two Distinct Units into a Unique 3D Architecture

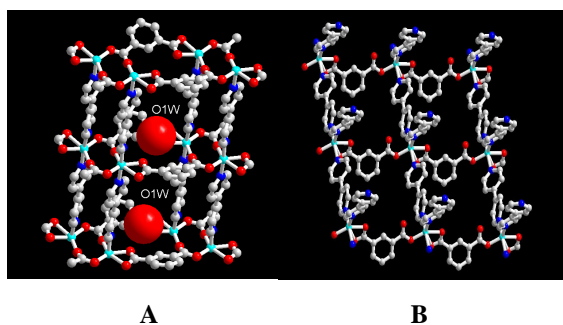

**Fig. S1** (A) Polymer **1** with the guest water encapsulated inside the box-like cavity; (B) the table-like polymer **2**.

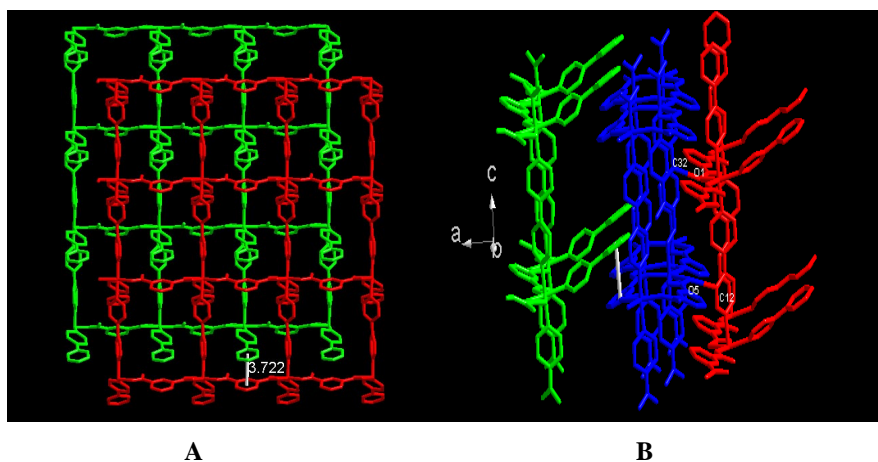

**Fig. S2** (A)  $\pi$  - $\pi$  interactions between phenyl rings of ip and 4, 4-bipy between the two embedded tables of polymer **2**; (B) the supramolecular interactions between **1** and **2**: C12...O5 = 3.268(6) Å, C32...O1 = 3.430(8) Å, C12—H12...O5 = 155.9(4)°, C32—H32...O1 = 165.6(4)°.
